# Supplementary material for: Aberrant Learned Irrelevance in Patients with First-Episode Schizophrenia-Spectrum Disorder
Source: MDPI journal article supplement (doi:10.3390/brainsci11111370), 2021-10-20
Supplement: s1 [file s1]

## Supplementary Materials

**Table S1.** Correlations of learning scores with cognitive functions in patients and controls.<sup>1</sup>

| Cognitive test      | Patients            |                     | Controls        |                     |
|---------------------|---------------------|---------------------|-----------------|---------------------|
|                     | Predictive cues     | Non-predictive cues | Predictive cues | Non-predictive cues |
| Letter number span  | 0.027               | 0.136               | 0.245           | 0.256               |
| Digit symbol        | 0.265               | 0.109               | 0.212           | 0.279               |
| Letter cancellation | -0.136              | -0.268              | -0.033          | 0.173               |
| Logical memory      | 0.266               | 0.023               | 0.110           | 0.151               |
| Trail making A      | -0.399 <sup>2</sup> | -0.217              | -0.153          | -0.290              |
| Trail making B      | -0.269              | -0.267              | -0.304          | -0.333 <sup>2</sup> |

<sup>1</sup> Spearman-rank correlation coefficients are presented. Bonferroni correction for multiple comparisons was applied.

<sup>2</sup> Correlations between predictive-cue learning scores and Trail making A ( $p = 0.018$ ) in patients, and between nonpredictive-cue learning scores and Trail making B ( $p = 0.033$ ) in controls did not survive correction for multiple comparisons (corrected  $p$  value = 0.002).
